# Supplementary material for: Precise redesign for improving enzyme robustness based on coevolutionary analysis and multidimensional virtual screening
Source: Royal Society of Chemistry journal article supplement (doi:10.1039/d4sc02058h), 2024-01-01
Supplement: d4sc02058h1.zip [file d4sc02058h1.zip]

## Sheet: Sheet1
File	Description
NK_WT_relax.pdb	Input structure for ddG prediction.
pos	Define which sites will be mutated.
restype	Specify which amino acids can be mutated to.
cartddg2020_ref2015.yaml	Set the mutation parameters, including scoring function, number of iterations, etc.
mpirun.yaml	Configuration files for parallel computing.
aggregate.yaml	Scripts for statistical analysis of predictions.
RosettaDDGPrediction.sh	Running script on the high performance computing cluster of the School of Biotechnology, Jiangnan University.
