# Supplementary material for: Precise redesign for improving enzyme robustness based on coevolutionary analysis and multidimensional virtual screening
Source: Royal Society of Chemistry journal article supplement (doi:10.1039/d4sc02058h), 2024-01-01
Supplement: d4sc02058h3.pdf [file d4sc02058h3.pdf]

## Supporting Information

### **Precise redesign for improving enzyme robustness based on coevolutionary analysis and multidimensional virtual screening**

Jie Luo<sup>1</sup>, Chenshuo Song<sup>1</sup>, Wenjing Cui<sup>1</sup>, Qiong Wang<sup>1</sup>, Zhemin Zhou\*<sup>1</sup>, Laichuang Han\*<sup>1</sup>

<sup>1</sup> Key Laboratory of Industrial Biotechnology (Ministry of Education), School of Biotechnology,  
Jiangnan University, Wuxi, Jiangsu, China.

\*corresponding authors :

Zhemin Zhou,

Key Laboratory of Industrial Biotechnology (Ministry of Education), School of Biotechnology,  
Jiangnan University.

Wuxi, Jiangsu, 214122, China

E-mail: zhmzhou@jiangnan.edu.cn

Laichuang Han,

Key Laboratory of Industrial Biotechnology (Ministry of Education), School of Biotechnology,  
Jiangnan University.

Wuxi, Jiangsu, 214122, China

E-mail: hanlaichuang@jiangnan.edu.cn

## Contents

|                                                                                                          |    |
|----------------------------------------------------------------------------------------------------------|----|
| Supplementary Tables.....                                                                                | 3  |
| Table S1. Plasmids and Bacterial strains used in this study. ....                                        | 3  |
| Table S2. Primers used in this study. ....                                                               | 4  |
| Table S3. Coevolutionary residue pairs selected from EVcouplings software. ....                          | 5  |
| Table S4. Screening mutants for molecular dynamics simulation. ....                                      | 6  |
| Table S5. Characterization of multidimensional dynamic parameters of mutants. ....                       | 8  |
| Table S6. Mutant grouping analysis. ....                                                                 | 9  |
| Table S7. The list of mutations presented in mutants M4, M5 and M6. ....                                 | 10 |
| Table S8. Protonation states of amino acids at different pH condition. ....                              | 10 |
| Supplementary Figures .....                                                                              | 11 |
| Figure S1. Interaction details of selected coevolutionary residue pairs. ....                            | 11 |
| Figure S2. Evaluation of the folding free energy of mutants. ....                                        | 12 |
| Figure S3. Correlation analysis of four parameters of mutants. ....                                      | 13 |
| Figure S4. Original image of SDS-PAGE of purified WT and mutants. ....                                   | 14 |
| Figure S5. Melting temperature derivative data of WT and mutants. ....                                   | 14 |
| Figure S6. Kinetics characteristic analysis for WT and mutants. ....                                     | 15 |
| Figure S7. The variation in RMSD between the WT and M6 at different temperatures and pH conditions. .... | 15 |
| Figure S8. Folding free energy of different enzymes. ....                                                | 16 |
| Figure S9. The fluctuation of mutant sequences at 300K simulation. ....                                  | 16 |
| Reference .....                                                                                          | 17 |

## Supplementary Tables

**Table S1. Plasmids and Bacterial strains used in this study.**

| Plasmid and strains     | Relevant characteristics                                                                                                                                                                        | source                 |
|-------------------------|-------------------------------------------------------------------------------------------------------------------------------------------------------------------------------------------------|------------------------|
| Plasmid                 |                                                                                                                                                                                                 |                        |
| pBP43-WapA-NK           | <i>E.coli-B.subtilis</i> shuttle vector, Amp <sup>R</sup> in <i>Escherichia coli</i> , Kan <sup>R</sup> in <i>Bacillus subtilis</i> , RepB, P43,signal peptide-WapA                             | Lab stock              |
| Strains                 |                                                                                                                                                                                                 |                        |
| <i>E. coli</i> JM109    | <i>recA1, supE44 endA1 hsdR17</i> ( <sup>+</sup> k,m <sup>+</sup> k) <i>gyrA96 relA1 thi</i> ( <i>lac-proAB</i> ) F <sup>+</sup> [ <i>traD36 proAB<sup>+</sup> lacI<sup>q</sup> lacZ ΔM15</i> ] | Lab stock              |
| <i>B. subtilis</i> comK | Derive from <i>B.subtilis</i> 168, <i>lacA::erm R-PxyLA-comK</i>                                                                                                                                | Lab stock <sup>1</sup> |

**Table S2. Primers used in this study.**

| Primer    | Primer Sequence (5'-3')                                    |
|-----------|------------------------------------------------------------|
| P-T22F-F  | CACTCTCAAGGCTACTTTGGCTCTAACGTAAAAGTAGCTGTTATCG             |
| P-T22L-F  | CACTCTCAAGGCTACCTTGGCTCTAACGTAAAAGTAGCTGTTATCG             |
| P-T22Y-F  | CTTCACTCTCAAGGCTACTATGGCTCTAACGTAAAAGTAGCTGTTATC           |
| P-T22-R   | GTAGCCTTGAGAGTGAAGAGCC                                     |
| P-S87-R   | TGGCGCTACGCCCAGAAC                                         |
| P-S87F-F  | GGGCGTAGCGCCAAGCGCATCATTATATGCAGTAAAAGTGCTTG               |
| P-S87L-F  | GGGCGTAGCGCCACTCGCATCATTATATGCAGTAAAAGTGCTTG               |
| P-S87W-F  | GGGCGTAGCGCCATGGGCATCATTATATTGTGTAAAAGTGCTTGATTC           |
| P-S87Y-F  | GGGCGTAGCGCCATACGCATCATTATATGCAGTAAAAGTGCTTG               |
| P-K27F-F  | CACAGGCTCTAACGTATTTGTAGCTGTTATCGACAGCGGAATTG               |
| P-K27L-F  | CACAGGCTCTAACGTACTGGTAGCTGTTATCGACAGCGGAATTG               |
| P-K27N-F  | CACAGGCTCTAACGTAAATGTAGCTGTTATCGACAGCGGAATTG               |
| P-K27H-F  | CACAGGCTCTAACGTACATGTAGCTGTTATCGACAGCGGAATTG               |
| P-K27R-F  | CACAGGCTCTAACGTAAGAGTAGCTGTTATCGACAGCGG                    |
| P-K27Y-F  | CACAGGCTCTAACGTATATGTAGCTGTTATCGACAGCGGAATTG               |
| P-K27-R   | TACGTTAGAGCCTGTGTAGCCTTG                                   |
| P-S89F-F  | GCGCCAAGCGCATTTTTATATGCAGTAAAAGTGCTTGATTCAACAGG            |
| P-S89L-F  | GCGCCAAGCGCACTGTTATATGCAGTAAAAGTGCTTGATTCAACAGG            |
| P-S89W-F  | GCGCCAAGCGCATGGTTATATGCAGTAAAAGTGCTTGATTCAACAGG            |
| P-S89Y-F  | GCGCCAAGCGCATATTTATATGCAGTAAAAGTGCTTGATTCAACAGG            |
| P-S89-R   | TGCGCTTGGCGCTACG                                           |
| P-H67A-F  | GTTCTCACGGTACGGCGGTCGCCGGTACGATTGCC                        |
| P-H67A-R  | CGTACCGTGAGAACTGCCG                                        |
| P-S207A-F | GGCGTGTCCATCCAAGCGACACTTCCTGGAGGCACTTAC                    |
| P-S207V-F | GGCGTGTCCATCCAAGTTACACTTCCTGGAGGCACTTAC                    |
| P-S207-R  | TTGGATGGACACGCCAGGAG                                       |
| P-N269W-F | CTTTCTACTATGGAAAAGGGTTAATCTGGGTACAAGCAGCTGCACAATAAG        |
| P-T255F-R | CCCTTTTCCATAGTAGAAAAGAGTTTCCAAGATAAAATGCAGTGCTTTCTAAACGATC |

---

|           |                                                            |
|-----------|------------------------------------------------------------|
|           | A                                                          |
| P-N269D-F | CTTTCTACTATGGAAAAGGGTTAATCGACGTACAAGCAGCTGCACAATAAG        |
| P-N269I-F | CTTTCTACTATGGAAAAGGGTTAATCATTGTACAAGCAGCTGCACAATAAG        |
| P-T255Y-R | CCCTTTTCCATAGTAGAAAAGAGTTTCCAAGATAATATGCAGTGCTTTCTAAACGATC |
|           | A                                                          |
| P-K141V-F | ATCAACTACTGTTTTTCAGCGCTGTAG                                |
| P-K141V-R | ATCAACTACTGTTTTTCAGCGCTGTAG                                |
| P-D140A-F | CTGAAAACAGTAGTTGCGAAAGCGGTTTCCAGCGGTATC                    |
| P-D140A-R | AACTACTGTTTTTCAGCGCTGTAG                                   |
| P-S173L-F | CCCTGCAAAAATATCCTCTGACTATTGCAGTAGGTGCGGTAAAC               |
| P-S173L-R | AGGATATTTTGCAGGGTAGCCG                                     |

---

**Table S3. Coevolutionary residue pairs selected from EVcouplings software.**

| Residue pairs | Score | Distance between C $\alpha$ (Å) |
|---------------|-------|---------------------------------|
| L96-G102      | 42.85 | 4.8                             |
| L209-G215     | 33.92 | 6.6                             |
| T22-S87       | 33.44 | 5.3                             |
| A230-V270     | 31.66 | 5.6                             |
| V93-W113      | 31.54 | 8.1                             |
| A230-I268     | 29.39 | 8.3                             |
| A179-F189     | 28.95 | 8.1                             |
| K27-Y91       | 28.88 | 7.4                             |
| E112-K141     | 27.51 | 8.4                             |
| V28-I72       | 27.10 | 8.3                             |
| G178-M199     | 27.02 | 4.5                             |
| K27-S89       | 26.92 | 5.0                             |
| A169-A176     | 26.73 | 4.1                             |
| D120-L235     | 26.67 | 8.4                             |
| D140-S173     | 26.52 | 6.4                             |
| A187-V203     | 26.45 | 6.8                             |
| H67-M222      | 26.16 | 8.0                             |
| H67-S207      | 25.72 | 5.4                             |
| V180-M199     | 25.09 | 6.6                             |
| T255-N269     | 23.78 | 6.8                             |

---

**Table S4. Screening mutants for molecular dynamics simulation.**

| Coevolutionary site | Mutants    | ddG (REU) | Molecular dynamic simulation |
|---------------------|------------|-----------|------------------------------|
| L96-G102            | G102F      | -1.8      | √                            |
|                     | G102W      | -1.6      |                              |
| T22S87              | T22FS87F   | -2.1      | √                            |
|                     | T22FS87L   | -2.0      | √                            |
|                     | T22FS87W   | -2.0      | √                            |
|                     | T22FS87Y   | -2.1      | √                            |
|                     | T22HS87F   | -1.7      |                              |
|                     | T22HS87L   | -1.7      |                              |
|                     | T22HS87Y   | -1.7      |                              |
|                     | T22LS87F   | -1.9      |                              |
|                     | T22LS87L   | -1.6      | √                            |
|                     | T22LS87W   | -1.9      | √                            |
|                     | T22LS87Y   | -1.9      |                              |
|                     | T22QS87L   | -1.6      |                              |
|                     | T22YS87F   | -2.2      | √                            |
|                     | T22YS87L   | -2.1      | √                            |
|                     | T22YS87M   | -1.6      |                              |
|                     | T22YS87W   | -2.2      | √                            |
| T22YS87Y            | -2.2       | √         |                              |
| E112K141            | E112WK141V | -1.6      | √                            |
| K27-S89             | K27FS89F   | -2.2      | √                            |
|                     | K27FS89L   | -2.6      | √                            |
|                     | K27FS89M   | -1.9      |                              |
|                     | K27FS89W   | -2.1      | √                            |
|                     | K27FS89Y   | -2.2      | √                            |
|                     | K27HS89F   | -1.9      |                              |
|                     | K27HS89L   | -2.1      | √                            |
|                     | K27HS89W   | -1.7      |                              |
|                     | K27HS89Y   | -1.9      |                              |
|                     | S89F       | -1.7      |                              |
|                     | S89L       | -2.0      | √                            |
|                     | S89W       | -1.7      |                              |
|                     | S89Y       | -1.8      |                              |
|                     | K27LS89E   | -1.7      |                              |
|                     | K27LS89F   | -2.5      | √                            |
|                     | K27LS89H   | -1.7      |                              |
|                     | K27LS89I   | -1.6      |                              |
| K27LS89L            | -2.1       | √         |                              |
| K27LS89N            | -1.7       |           |                              |

|           |            |      |   |
|-----------|------------|------|---|
|           | K27LS89Q   | -1.9 |   |
|           | K27LS89V   | -1.8 |   |
|           | K27LS89W   | -2.5 | √ |
|           | K27LS89Y   | -2.6 | √ |
|           | K27MS89F   | -1.7 |   |
|           | K27MS89L   | -1.7 |   |
|           | K27MS89W   | -1.6 |   |
|           | K27MS89Y   | -1.7 |   |
|           | K27NS89F   | -1.9 |   |
|           | K27NS89L   | -2.1 | √ |
|           | K27NS89N   | -1.6 |   |
|           | K27NS89W   | -1.8 |   |
|           | K27NS89Y   | -2.0 | √ |
|           | K27RS89F   | -1.7 |   |
|           | K27RS89L   | -2.0 | √ |
|           | K27RS89W   | -1.6 | √ |
|           | K27RS89Y   | -1.7 |   |
|           | K27WS89F   | -1.6 |   |
|           | K27WS89L   | -2.0 | √ |
|           | K27WS89W   | -1.7 |   |
|           | K27WS89Y   | -1.7 |   |
|           | K27YS89F   | -2.2 | √ |
|           | K27YS89L   | -2.6 | √ |
|           | K27YS89M   | -1.8 |   |
|           | K27YS89W   | -2.0 | √ |
|           | K27YS89Y   | -2.2 | √ |
| D140-S173 | D140AS173L | -1.6 | √ |
| H67-M222  | H67AM222F  | -1.6 | √ |
| H67-S207  | H67AS207A  | -2.1 | √ |
|           | H67AS207T  | -2.7 | √ |
|           | H67AS207V  | -3.2 | √ |
|           | H67FS207D  | -1.8 |   |
|           | H67HS207N  | -1.6 |   |
| T255N269  | T255FN269W | -2.2 | √ |
|           | T255FN269Y | -1.6 |   |
|           | T255IN269D | -1.7 | √ |
|           | T255IN269L | -1.6 | √ |
|           | T255WN269W | -1.7 |   |
|           | T255YN269I | -1.7 | √ |
|           | T255YN269L | -1.7 |   |
|           | T255YN269W | -1.9 |   |

Note: REU means the Rosetta Energy Unit.

**Table S5. Characterization of multidimensional dynamic parameters of mutants.**

| Entry      | RMSD(Å)    | $\Delta$ RMSD(Å) | R <sub>g</sub> (Å) | $\Delta$ R <sub>g</sub> (Å) | H-bond      | $\Delta$ H-bond |
|------------|------------|------------------|--------------------|-----------------------------|-------------|-----------------|
| G102F      | 1.99±0.36  | 0.36             | 17.16±0.09         | 0.04                        | 46.72±6.03  | -2.03           |
| T22FS87F   | 1.67±0.23  | 0.04             | 17.13±0.09         | 0.01                        | 49.16±6.05  | 0.41            |
| T22FS87L   | 1.44±0.19* | -0.19            | 17.01±0.07*        | -0.11                       | 50.26±6.16* | 1.51            |
| T22FS87W   | 1.46±0.19* | -0.17            | 17.06±0.08*        | -0.06                       | 51.23±6.11* | 2.48            |
| T22FS87Y   | 1.57±0.19  | -0.06            | 17.10±0.08         | -0.02                       | 48.55±6.61  | -0.20           |
| T22LS87L   | 1.63±0.26  | 0.00             | 17.12±0.10         | 0.00                        | 49.56±6.23* | 0.81            |
| T22LS87W   | 1.44±0.18* | -0.19            | 17.05±0.08*        | -0.07                       | 49.13±6.02  | 0.38            |
| T22YS87F   | 1.50±0.19  | -0.13            | 17.08±0.08         | -0.04                       | 49.83±5.97* | 1.08            |
| T22YS87L   | 1.41±0.13* | -0.22            | 17.05±0.07*        | -0.07                       | 49.80±5.96* | 1.05            |
| T22YS87W   | 1.46±0.16* | -0.17            | 17.06±0.07*        | -0.06                       | 48.12±5.99  | -0.63           |
| T22YS87Y   | 1.43±0.19* | -0.20            | 17.05±0.08         | -0.07                       | 49.76±6.22* | 1.01            |
| E112WK141V | 1.53±0.25  | -0.10            | 17.06±0.08*        | -0.06                       | 49.45±6.04  | 0.70            |
| K27FS89F   | 1.66±0.25  | 0.03             | 17.13±0.09         | 0.01                        | 48.29±6.17  | -0.46           |
| K27FS89L   | 1.63±0.22  | 0.00             | 17.11±0.09         | -0.01                       | 49.44±6.17  | 0.69            |
| K27FS89W   | 1.65±0.20  | 0.02             | 17.10±0.08         | -0.02                       | 48.98±6.00  | 0.23            |
| K27FS89Y   | 1.42±0.13* | -0.21            | 17.07±0.07*        | -0.05                       | 48.75±5.97  | 0.00            |
| K27HS89L   | 1.58±0.35  | -0.05            | 17.10±0.13         | -0.02                       | 49.11±6.13  | 0.36            |
| S89L       | 1.40±0.11* | -0.23            | 17.04±0.07*        | -0.08                       | 48.74±6.16  | -0.01           |
| K27LS89F   | 1.52±0.22  | -0.11            | 17.08±0.09         | -0.04                       | 48.86±5.99  | 0.11            |
| K27LS89L   | 1.45±0.16* | -0.18            | 17.05±0.07*        | -0.07                       | 48.56±6.18  | -0.19           |
| K27LS89W   | 1.39±0.13* | -0.24            | 17.03±0.07*        | -0.09                       | 48.80±6.06  | 0.05            |
| K27LS89Y   | 1.37±0.13* | -0.26            | 17.02±0.06*        | -0.10                       | 49.02±6.08  | 0.27            |
| K27NS89L   | 1.58±0.31  | -0.05            | 17.04±0.08*        | -0.08                       | 48.02±6.08  | 0.27            |
| K27NS89Y   | 1.41±0.17* | -0.22            | 17.04±0.08*        | -0.08                       | 49.77±6.04* | 1.02            |
| K27RS89L   | 1.63±0.18  | 0.00             | 17.11±0.08         | -0.01                       | 50.09±6.15* | 1.34            |
| K27RS89W   | 1.81±0.36  | 0.18             | 17.09±0.08         | -0.03                       | 49.46±6.03  | 0.71            |
| K27WS89L   | 1.66±0.35  | 0.03             | 17.11±0.12         | -0.01                       | 48.14±6.06  | -0.61           |
| K27YS89F   | 1.50±0.15  | -0.13            | 17.08±0.08         | -0.04                       | 48.34±6.25  | -0.41           |
| K27YS89L   | 1.36±0.12* | -0.27            | 17.04±0.07*        | -0.08                       | 49.96±6.20* | 1.21            |
| K27YS89W   | 1.31±0.17* | -0.32            | 17.03±0.07*        | -0.09                       | 49.08±6.07  | 0.33            |
| K27YS89Y   | 1.41±0.13* | -0.22            | 17.04±0.06*        | -0.08                       | 49.86±6.13* | 1.11            |
| D140AS173L | 1.59±0.19  | -0.04            | 17.10±0.08         | -0.02                       | 48.93±6.03  | 0.18            |
| H67AS207A  | 1.70±0.16  | 0.07             | 17.07±0.08*        | -0.05                       | 49.54±6.20* | 0.79            |
| H67AS207T  | 1.60±0.25  | -0.03            | 17.07±0.09*        | -0.05                       | 50.04±6.20* | 1.29            |
| H67AS207V  | 1.49±0.18  | -0.14            | 17.05±0.08*        | -0.07                       | 49.79±6.06* | 1.04            |
| H67AM222F  | 1.58±0.19  | -0.05            | 17.11±0.08         | -0.01                       | 49.49±5.97  | 0.74            |
| T255FN269W | 1.65±0.21  | 0.02             | 17.09±0.07         | -0.03                       | 48.30±6.00  | -0.45           |
| T255IN269D | 1.59±0.20  | -0.04            | 17.12±0.08         | 0.00                        | 50.01±6.13* | 1.26            |
| T255IN269L | 1.45±0.23* | -0.18            | 17.05±0.09*        | -0.07                       | 49.08±6.11  | 0.33            |



|            |           |       |            |       |            |      |
|------------|-----------|-------|------------|-------|------------|------|
| T255YN269I | 1.62±0.22 | -0.01 | 17.09±0.07 | -0.03 | 49.42±6.08 | 0.66 |
|------------|-----------|-------|------------|-------|------------|------|

The parameter of MD simulations employed the Kruskal-Wallis test for analysis at 5% level.

\* Denotes significant differences in values corresponding to the mutant compared to the WT ( $P < 0.05$ ).

**Table S6. Mutant grouping analysis.**

| Overlapping mutants in three groups | Others     | Filter out |
|-------------------------------------|------------|------------|
| T22FS87L                            | T22LS87W   | G102F      |
| T22FS87W                            | T22YS87W   | T22FS87Y   |
| T22YS87L                            | T22YS87F   | K27FS89F   |
| T22YS87Y                            | K27LS89L   | K27FS89W   |
| K27NS89Y                            | T22FS87F   | K27WS89L   |
| K27YS89L                            | T22LS87L   | K27HS89L   |
| K27YS89Y                            | K27LS89Y   | D140AS173L |
| H67AS207V                           | K27YS89W   | T255FN269W |
|                                     | K27NS89L   |            |
|                                     | K27LS89W   |            |
|                                     | K27LS89F   |            |
|                                     | K27FS89L   |            |
|                                     | K27RS89L   |            |
|                                     | K27RS89W   |            |
|                                     | K27YS89F   |            |
|                                     | K27FS89Y   |            |
|                                     | S89L       |            |
|                                     | H67AM222F  |            |
|                                     | H67AS207T  |            |
|                                     | H67AS207A  |            |
|                                     | E112WK141V |            |
|                                     | T255IN269L |            |
|                                     | T255IN269D |            |
|                                     | T255YN269I |            |

Overlapping mutants in three groups means the intersection of three sets in a Venn diagram. Others means the mutants outside of three sets but at least one set is satisfied. Filter out means the mutants do not belong to any set.

**Table S7. The list of mutations presented in mutants M4, M5 and M6.**

| Entry           | Mutations                                          |
|-----------------|----------------------------------------------------|
| M4 <sup>2</sup> | P57CS62AA92CN181DY217KN218SN259P                   |
| M5              | T22FS87LT255IN269D                                 |
| M6              | T22FP57CS62AS87LA92CN181DY217KN218ST255IN269DN259P |

**Table S8. Protonation states of amino acids at different pH condition.**

| pH  | Protonation states | Residues                 |                                |
|-----|--------------------|--------------------------|--------------------------------|
|     |                    | WT                       | M6                             |
| pH3 | ASPP               | 32, 41, 60, 120, 248     | 32, 41, 60, 120, 181, 248, 269 |
|     | GLUP               | 54, 112, 156, 195, 251   | 112, 156, 251                  |
|     | HSP                | 17, 39, 64, 67, 226, 238 | 17, 39, 64, 67, 226, 238       |
|     | HSD                | -                        | -                              |
|     | HSE                | -                        | -                              |
| pH7 | ASPP               | -                        | -                              |
|     | GLUP               | -                        | -                              |
|     | HSP                | 64                       | 64                             |
|     | HSD                | 67, 226                  | 226                            |
|     | HSE                | 17, 39, 238              | 17, 39, 67, 238                |

Note: The Protonation states of each residue were determined by the PDB2PQR (<https://server.poissonboltzmann.org/pdb2pqr>)<sup>3</sup>. ASPP and GLUP means the protonated Asp and Glu, respectively. HSP means the protonated His; HSD means the neutral His, proton on ND1; HSE means the neutral His, proton on NE2.

## Supplementary Figures

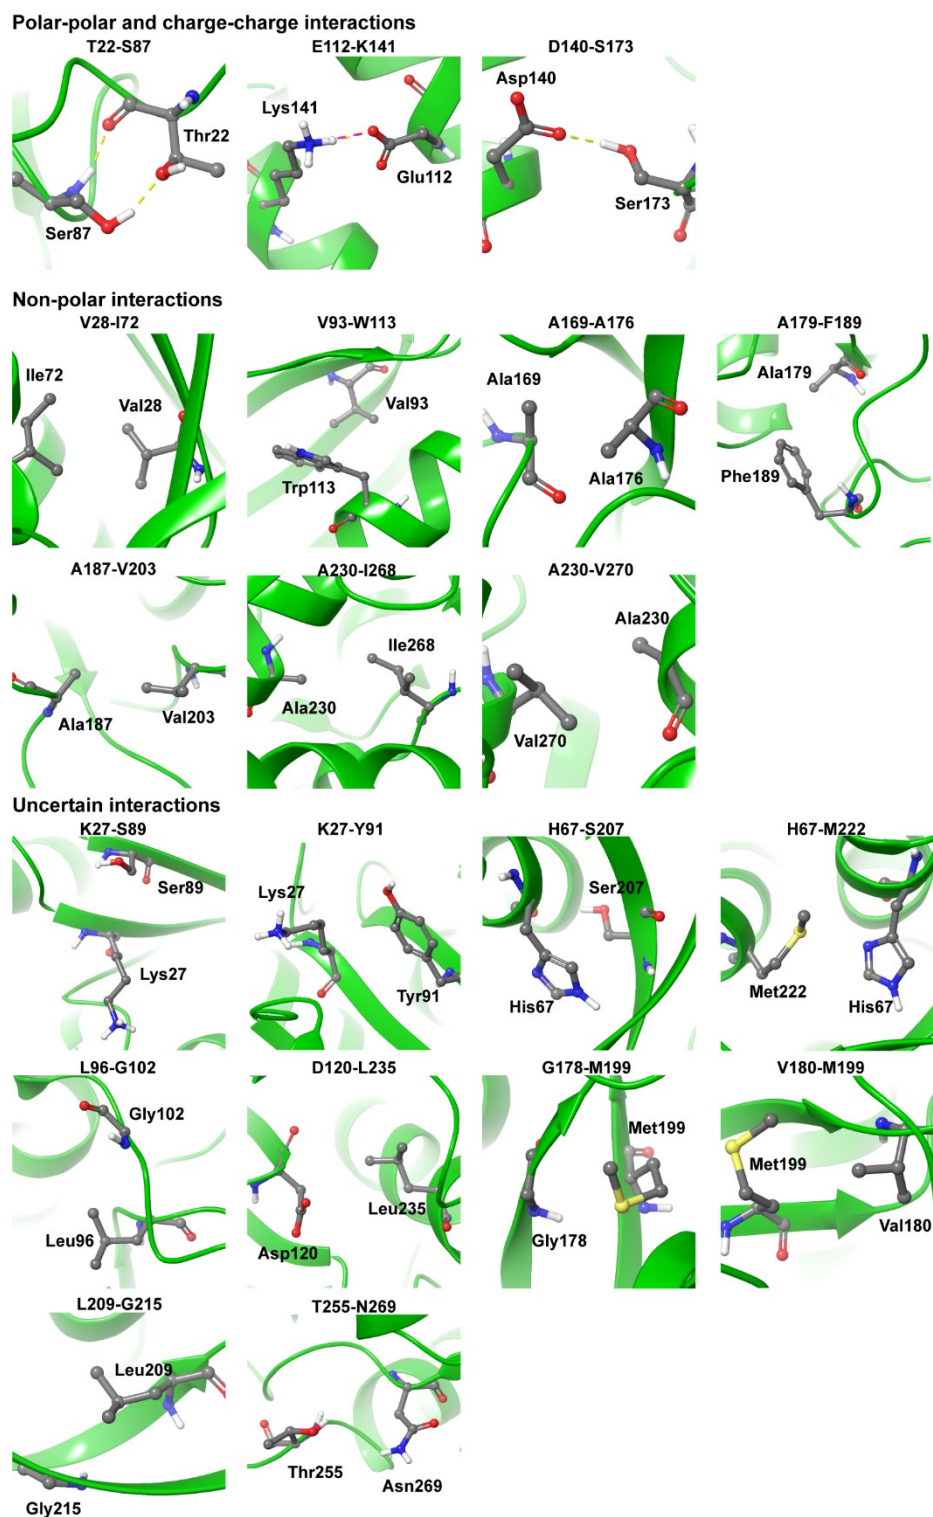

**Figure S1. Interaction details of selected coevolutionary residue pairs.**

Hydrogen bonding interactions are highlighted by dashed lines in yellow, and salt-bridge interactions are in magenta.

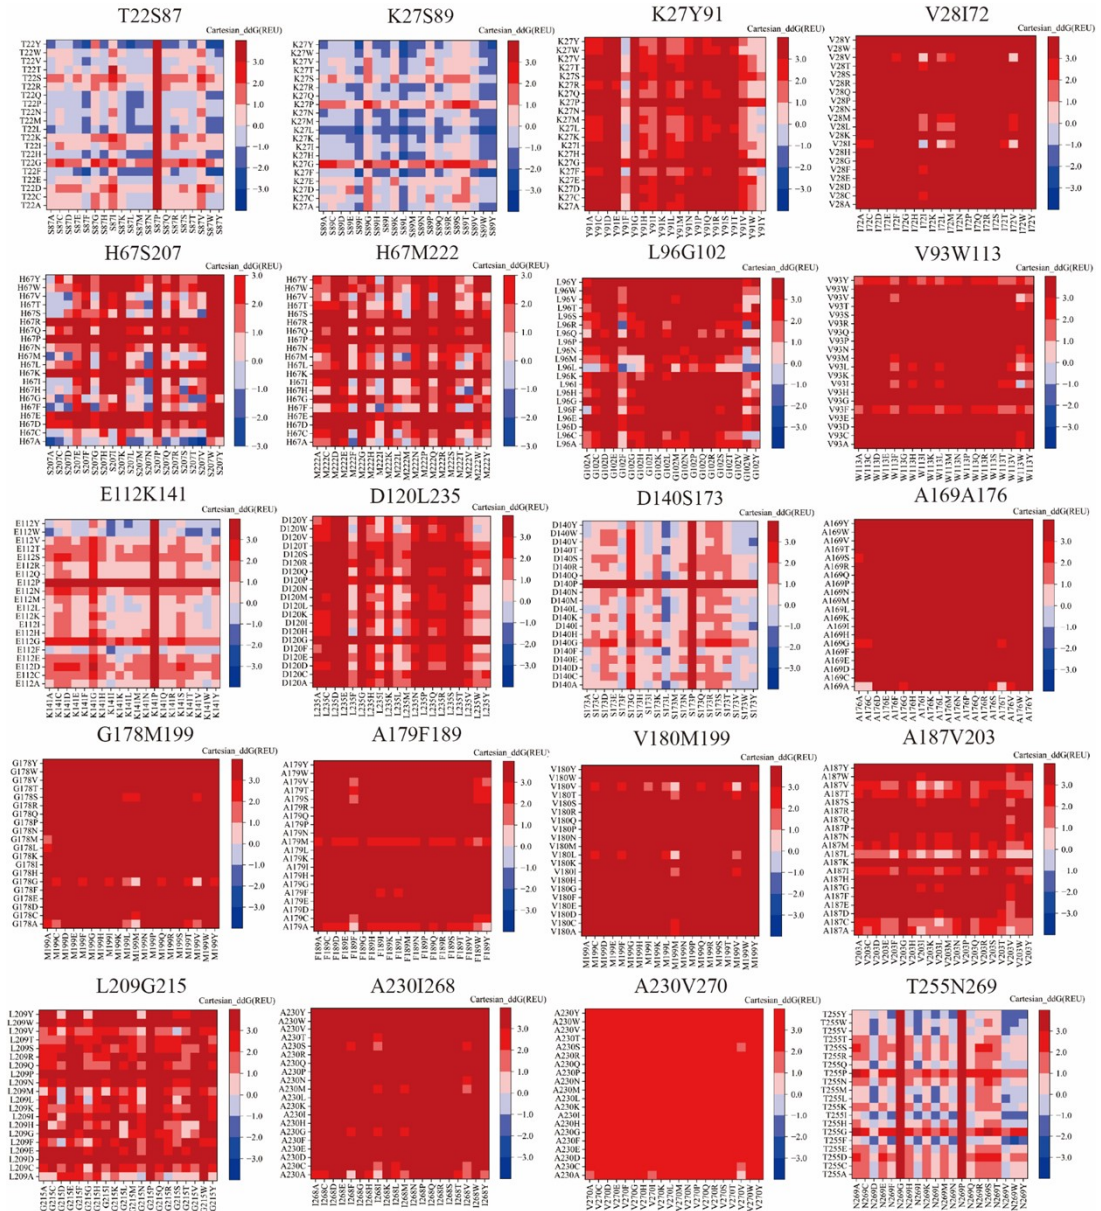

**Figure S2. Evaluation of the folding free energy of mutants.**

Each  $\Delta\Delta G$  of the total 7980 mutations in the virtual mutant library were calculated. REU means the Rosetta Energy Unit, Range from -3.2 to 3.0.

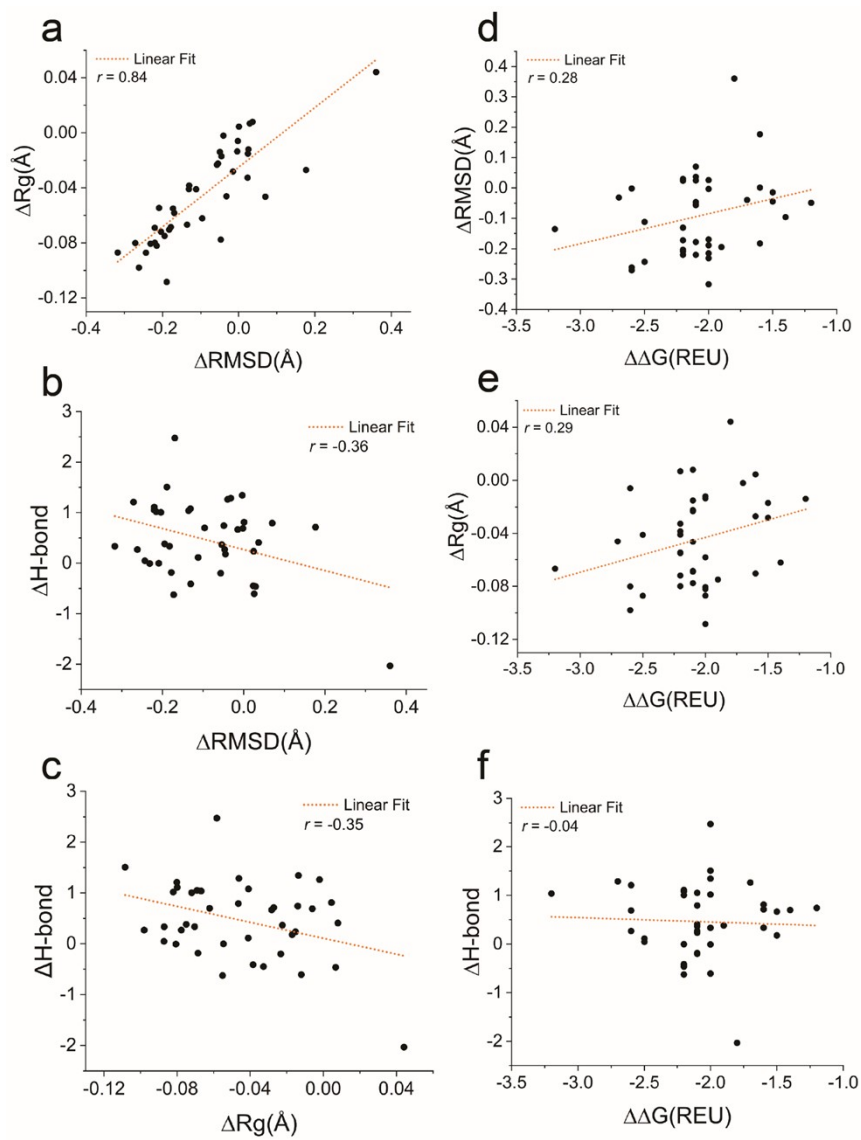

**Figure S3. Correlation analysis of four parameters of mutants.**

Pearson's chi squared test based on mutant parameter values.

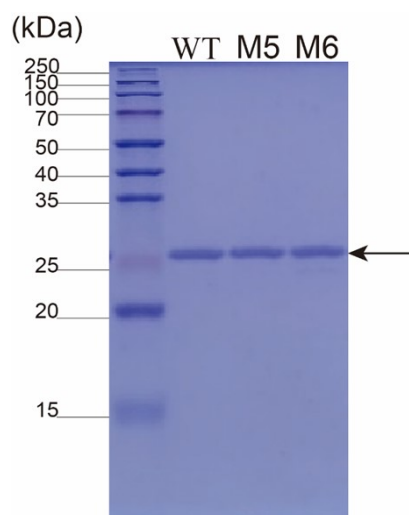

**Figure S4. Original image of SDS-PAGE of purified WT and mutants.**

The black arrow indicates the position of Nattokinase on SDS-PAGE gel.

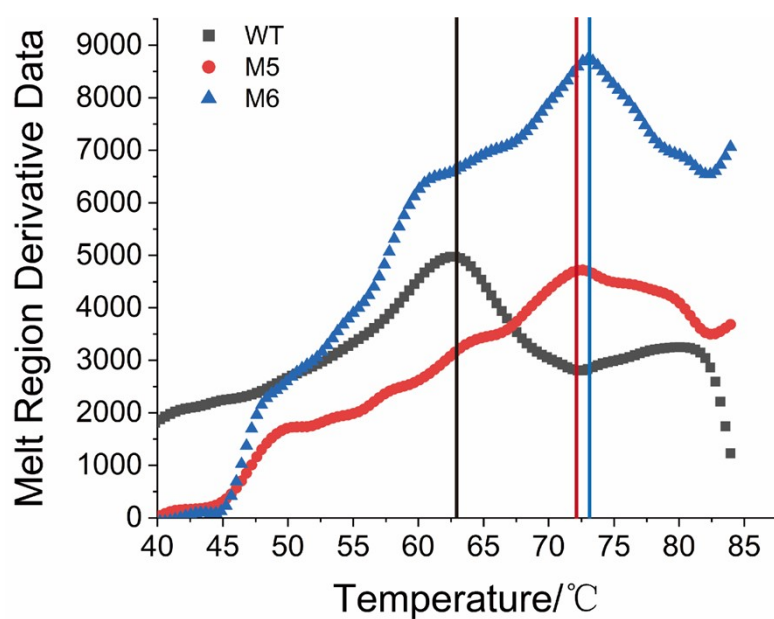

**Figure S5. Melting temperature derivative data of WT and mutants.**

The fluorescence was tracked using a built-in detector. The StepOnePlus™ real-time PCR system calculated the derived melting temperature data.  $T_m$  is represented by the three different vertical lines indicating the temperatures at which absolute fluorescence change rates decrease sharply.

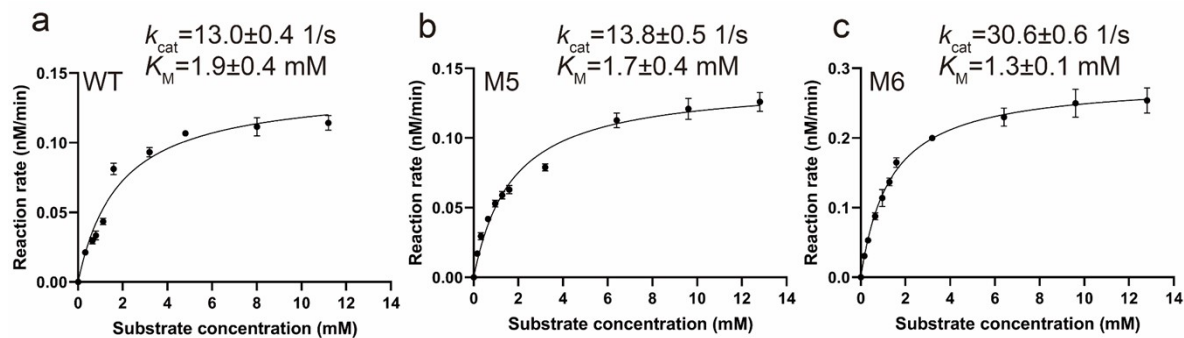

**Figure S6. Kinetics characteristic analysis for WT and mutants.**

The reaction rate was represented in nM.min<sup>-1</sup>per nM enzyme.

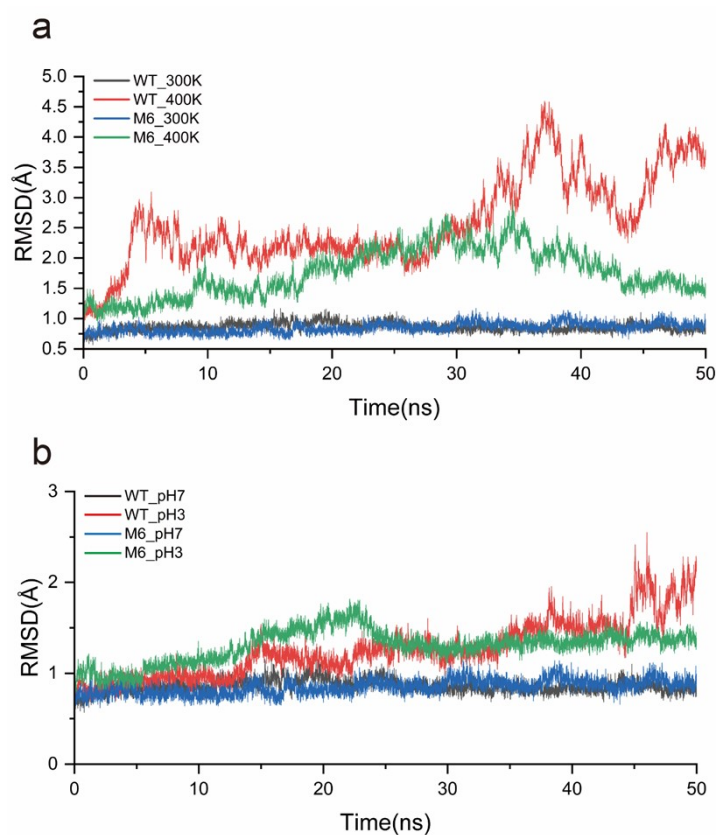

**Figure S7. The variation in RMSD between the WT and M6 at different temperatures and pH conditions.**

Comparison of the RMSD values between the WT and mutant M6 under various simulated temperatures (a) and pH

(b) condition.

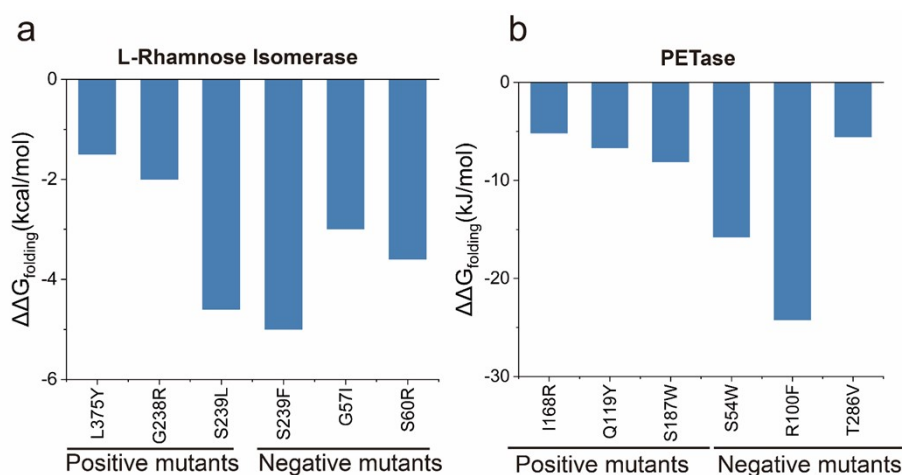

**Figure S8. Folding free energy of different enzymes.**

Folding free energy of L-Rhamnose Isomerase (a)<sup>4</sup> and PETase(b)<sup>5</sup>. We selected two enzymes from existing reports to validate the multidimensional parameter screening system.

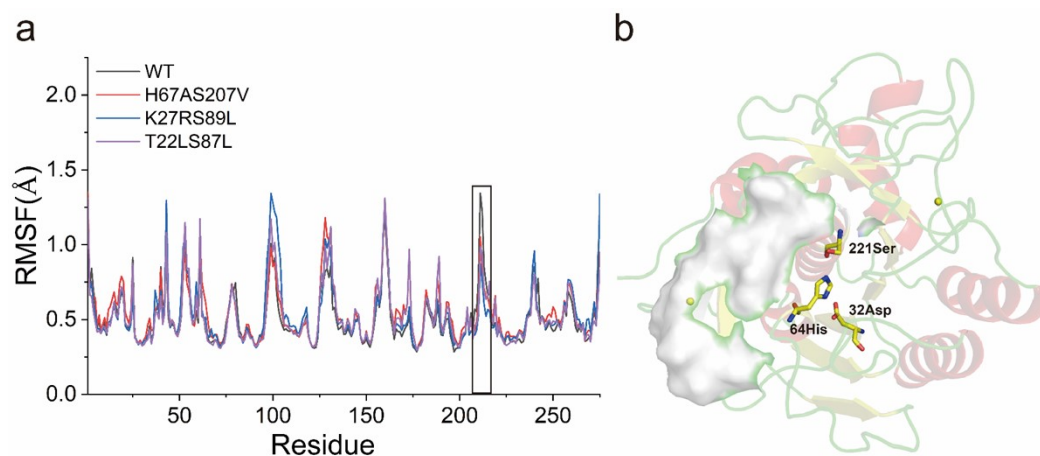

**Figure S9. The fluctuation of mutant sequences at 300K simulation.**

(a) Comparison of RMSF values of WT and mutants under 300K condition. Black box expression the region from 210 to 220 exhibits increased rigidity in mutants compared to the WT. (b) The three-dimensional structure of NK. The gray surface represents region from 210 to 220. 32Asp, 64His, 221Ser represent catalytic region of NK.



## Reference

1. L. Han, W. J. Cui, F. Y. Suo, S. N. Miao, W. L. Hao, Q. Q. Chen, J. L. Guo, Z. M. Liu, L. Zhou and Z. M. Zhou, Development of a novel strategy for robust synthetic bacterial promoters based on a stepwise evolution targeting the spacer region of the core promoter in *Bacillus subtilis*, *Microb Cell Fact*, 2019, **18**.
2. J. Luo, C. S. Song, W. J. Cui, L. C. Han and Z. M. Zhou, Counteraction of stability-activity trade-off of Nattokinase through flexible region shifting, *Food Chem*, 2023, **423**.
3. E. Jurrus, D. Engel, K. Star, K. Monson, J. Brandi, L. E. Felberg, D. H. Brookes, L. Wilson, J. H. Chen, K. Liles, M. J. Chun, P. Li, D. W. Gohara, T. Dolinsky, R. Konecny, D. R. Koes, J. E. Nielsen, T. Head-Gordon, W. H. Geng, R. Krasny, G. W. Wei, M. J. Holst, J. A. McCammon and N. A. Baker, Improvements to the APBS biomolecular solvation software suite, *Protein Sci*, 2018, **27**, 112-128.
4. M. J. Wei, X. Gao, W. Zhang, C. Li, F. P. Lu, L. J. Guan, W. D. Liu, J. W. Wang, F. H. Wang and H. M. Qin, Enhanced Thermostability of L-Rhamnose Isomerase for D-Allose Synthesis by Computation-Based Rational Redesign of Flexible Regions, *J Agr Food Chem*, 2023, **71**, 15713-15722.
5. Y. L. Cui, Y. C. Chen, X. Y. Liu, S. J. Dong, Y. E. Tian, Y. X. Qiao, R. Mitra, J. Han, C. L. Li, X. Han, W. D. Liu, Q. Chen, W. Q. Wei, X. Wang, W. B. Du, S. Y. Tang, H. Xiang, H. Y. Liu, Y. Liang, K. N. Houk and B. Wu, Computational Redesign of a PETase for Plastic Biodegradation under Ambient Condition by the GRAPE Strategy, *Acs Catal*, 2021, **11**, 1340-1350.
